# Supplementary material for: Against Putin and Corruption, for Navalny and the “Revolution”?
Source: Oxford University Press journal article supplement (doi:10.1525/j.postcomstud.2022.55.1.99), 2022-03-01
Supplement: cpcs-55-01-05-fomin-and-nadskakula-kaczmarczyk-supplement-2.xlsx [file cpcs-55-01-05-fomin-and-nadskakula-kaczmarczyk-supplement-2.xlsx]

## Sheet: description
SUPPLEMENT 2. Database of non-unique protest items.
This database contains information about the types of non-unique (series-printed and series-produced) visual items (banners, posters, ribbons, stickers etc.) that were used by the Russian protesters in the demonstrations of 26 March 2017, 29 April 2017, 12 June 2017, 07 October 2017 and 28 January 2018 in Arkhangelsk, Barnaul, Chelyabinsk, Irkutsk, Izhevsk, Kazan, Khabarovsk, Moscow, Nizhny Novgo…

## Sheet: variables
Variable	Desription	Notes
t_id	ID of a type of protest item.	For example, 17 is the t_id of all the turquois posters "Жалкий. Трусливый. Вор." with a picture of a duck.
u_id	ID of an occasion (date-city) of use of a particular type of item	For example, 25, 31, 51 and 169 are the u_id's that stand for four different protest occasions in which the items of type 17 were used (26 March 2017 in Vladivostok, 26 March 2017 in Saint Petersburg, 26 March 2017 in Novosibirsk and 12 June 2017 in Moscow).
date	Date of use of the type of the item
city	City of use of the type of the item
media	Medium of the type of the item
nonverbaltext	Verbal description of the non-verbal text of the item (semicolon-separated list of forms)
nonverbaltopics	Content of the non-verbal text of the type of the item (semicolon-separated list of topics)
verbaltext	Verbal text of the item
verbaltopics	Content of the verbal text of the item (semicolon-separated list of topics)
topics	Content of the item (semicolon-separated list of topics)
URL1	URL of the main photo report from which the use of item is coded.
URL2	URL of the additional photo report

## Sheet: data
u_id	t_id	date	city	media	nonverbaltext	nonverbaltopics	verbaltext	verbaltopics	topics	URL1	URL2
244	67	2017-10-07	Barnaul	Balloon			Н !	Navalny; elections	Navalny; elections	https://www.kommersant.ru/gallery/3433645?from=doc_vrez#id=1495454
260	67	2018-01-28	Moscow	Balloon			Н !	Navalny; elections	Navalny; elections	https://www.kommersant.ru/photo/photo/1004772
261	67	2018-01-28	Samara	Balloon			Н !	Navalny; elections	Navalny; elections	https://www.kommersant.ru/photo/category_in/101829?id2=37
275	67	2018-01-28	Nizhny Novgorod	Balloon			Н !	Navalny; elections	Navalny; elections	https://www.kommersant.ru/photo/category_in/101828?id2=37
278	67	2018-01-28	Perm	Balloon			Н !	Navalny; elections	Navalny; elections	https://www.kommersant.ru/photo/category_in/101826?id2=37
287	67	2018-01-28	Novosibirsk	Balloon			Н !	Navalny; elections	Navalny; elections	https://www.kommersant.ru/photo/category_in/101824?id2=37
298	67	2018-01-28	Saratov	Balloon			Н !	Navalny; elections	Navalny; elections	https://www.novayagazeta.ru/articles/2018/01/29/75319-narod-peretaptyvaetsya
132	59	2017-06-12	Novosibirsk	Poster	duck	corruption; Medvedev	?! Вы тратите на дачи наши деньги	corruption; Medvedev	corruption; Medvedev	https://www.kommersant.ru/photo/photo/923958
127	55	2017-06-12	Novosibirsk	Poster	duck	corruption; Medvedev	?! Запретить фильм - это ваша борьба с коррупцией?	"On vam ne Dimon"; corruption; response	Medvedev; "On vam ne Dimon"; corruption; response	https://www.kommersant.ru/photo/photo/923958
163	55	2017-06-12	Yekaterinburg	Poster	duck	corruption; Medvedev	?! Запретить фильм - это ваша борьба с коррупцией?	"On vam ne Dimon"; corruption; response	Medvedev; "On vam ne Dimon"; corruption; response	https://www.kommersant.ru/photo/photo/923096
117	51	2017-06-12	Nizhny Novgorod	Poster	duck	corruption; Medvedev	?! Сами вы держитесь	Medvedev; money; response	Medvedev; money; response; corruption	https://www.kommersant.ru/photo/photo/987534
126	51	2017-06-12	Novosibirsk	Poster	duck	corruption; Medvedev	?! Сами вы держитесь	Medvedev; money; response	Medvedev; money; response; corruption	https://www.kommersant.ru/photo/photo/923958
179	51	2017-06-12	Samara	Poster	duck	corruption; Medvedev	?! Сами вы держитесь	Medvedev; money; response	Medvedev; money; response; corruption	https://www.novayagazeta.ru/articles/2017/06/12/72778-gde-bolshe-vsego-zaderzhannyh-u-kogo-samaya-krupnaya-utochka-i-chto-ukral-navalnyy
191	51	2017-06-12	Izhevsk	Poster	duck	corruption; Medvedev	?! Сами вы держитесь	Medvedev; money; response	Medvedev; money; response; corruption	https://www.vedomosti.ru/politics/galleries/2017/06/12/693997-rossiya-protiv-korruptsii#/galleries/140737493327853/fullscreen/6
125	54	2017-06-12	Novosibirsk	Poster	duck	corruption; Medvedev	?! Хватит нести чушь про компот	response	response; corruption; Medvedev	https://www.kommersant.ru/photo/photo/923958
157	76	2017-06-12	Kazan	Poster	duck	Medvedev; corruption	?! я - патриот, я против коррупции	patriotism; corruption; response	patriotism; corruption; response; Medvedev	https://www.kommersant.ru/photo/photo/923223
253	99	2018-01-28	Moscow	Poster			# забастовка	boycott; elections	boycott; elections	https://www.kommersant.ru/photo/photo/1004839
266	99	2018-01-28	Samara	Poster			# забастовка	boycott; elections	boycott; elections	https://www.kommersant.ru/photo/category_in/101829?id2=37
311	99	2018-01-28	Tyumen	Poster			# забастовка	boycott; elections	boycott; elections	https://www.vedomosti.ru/politics/articles/2018/01/28/749182-zabastovka#%2Fgalleries%2F140737493734267%2Ffullscreen%2F6
99	40	2017-04-29	Moscow	Dress			# надоел	Putin; elections	Putin; elections	https://www.novayagazeta.ru/articles/2017/04/29/72332-nadoel-v-moskve-buldozer-ne-meshal-prohodu-grazhdan-s-pismami-prezidentu-putinu
109	47	2017-06-12	Moscow	Dress			# надоел	Putin; elections	Putin; elections	https://www.kommersant.ru/photo/photo/970416
197	86	2017-06-12	Moscow	Sticker	Putin	Putin	# надоел	Putin; elections	Putin; elections	https://www.gazeta.ru/social/photo/protestnye_aktsii_v_moskve.shtml#!photo=13
100	41	2017-04-29	Kazan	Object	letter; Putin		# надоел москва кремль	Putin; elections	Putin; elections	https://www.kommersant.ru/photo/photo/904352
101	42	2017-04-29	Saint Petersburg	Poster	Putin; yellow tape	Putin	# надоел! 29.04.2017 м. Горьковская 14:00	Putin; elections; meeting	Putin; elections; meeting	https://www.kommersant.ru/photo/photo/904145
289	113	2018-01-28	Moscow	Poster			18 марта выбираю забастовку	boycott; elections	boycott; elections	https://www.rbc.ru/photoreport/28/01/2018/5a6dd54c9a7947b08da30aa6
83	37	2017-03-26	Samara	Badge			20!8			https://www.kommersant.ru/photo/photo/662114
137	63	2017-06-12	Tomsk	Badge			20!8	Navalny; elections	Navalny; elections	https://www.kommersant.ru/photo/photo/923685
272	108	2018-01-28	Yekaterinburg	Balloon			20!8	Navalny; elections	Navalny; elections	https://www.kommersant.ru/photo/category_in/101833?id2=37
281	108	2018-01-28	Novosibirsk	Balloon			20!8	Navalny; elections	Navalny; elections	https://www.kommersant.ru/photo/category_in/101824?id2=37
291	108	2018-01-28	Omsk	Balloon			20!8	Navalny; elections	Navalny; elections	https://www.novayagazeta.ru/articles/2018/01/28/75298-zabastovka-izbirateley-28-yanvarya-onlayn
297	108	2018-01-28	Irkutsk	Balloon			20!8	Navalny; elections	Navalny; elections	https://meduza.io/live/2018/01/28/zabastovka-izbirateley-po-vsey-rossii-hronika
300	108	2018-01-28	Saratov	Balloon			20!8	Navalny; elections	Navalny; elections	https://www.novayagazeta.ru/articles/2018/01/29/75319-narod-peretaptyvaetsya
308	108	2018-01-28	Chelyabinsk	Balloon			20!8	Navalny; elections	Navalny; elections	https://www.vedomosti.ru/politics/articles/2018/01/28/749182-zabastovka#%2Fgalleries%2F140737493734267%2Ffullscreen%2F6
313	108	2017-10-07	Arkhangelsk	Balloon			20!8	Navalny; elections	Navalny; elections	https://meduza.io/live/2017/10/07/kak-prohodyat-aktsii-v-podderzhku-navalnogo-po-vsey-rossii-onlayn	https://twitter.com/akozenko/status/916647223210868738
229	94	2017-10-07	Novosibirsk	Flag	Artpodgotovka logo	Artpodgotovka	artpodgotovka.com	Artpodgotovka	Artpodgotovka	https://www.novayagazeta.ru/articles/2017/10/07/74099-aktsii-storonnikov-navalnogo-v-desyatkah-gorodov-rossii	https://twitter.com/teamnavalny/status/916608227424514048/photo/1
58	27	2017-03-26	Tomsk	Badge			H !	Navalny; elections	Navalny; elections	https://meduza.io/feature/2017/03/27/ot-peterburga-do-vladivostoka-vserossiyskaya-aktsiya-protesta-v-fotografiyah
122	27	2017-06-12	Novosibirsk	Badge			H !	Navalny; elections	Navalny; elections	https://www.kommersant.ru/photo/photo/923958
140	66	2017-06-12	Tomsk	Poster	Putin; Sechin; Kadyrov	Putin; Sechin; Kadyrov	алишер усманов надоел! надоел!	Usmanov	Putin; Sechin; Kadyrov; Usmanov	https://www.kommersant.ru/photo/photo/923685
168	80	2017-06-12	Yekaterinburg	Flag	Artpodgotovka logo	Artpodgotovka	Артподготовка 05/11/2017	revolution	revolution; Artpodgotovka	https://www.novayagazeta.ru/articles/2017/06/12/72778-gde-bolshe-vsego-zaderzhannyh-u-kogo-samaya-krupnaya-utochka-i-chto-ukral-navalnyy
205	80	2017-10-07	Yekaterinburg	Flag	Artpodgotovka logo	Artpodgotovka	Артподготовка 05/11/2017	revolution	revolution; Artpodgotovka	https://www.kommersant.ru/photo/photo/957969
251	98	2018-01-28	Moscow	Poster			без меня! # забастовка	boycott; elections	boycott; elections	https://www.kommersant.ru/photo/photo/1004839
301	98	2018-01-28	Vladivostok	Poster			без меня! # забастовка	boycott; elections	boycott; elections	https://www.vedomosti.ru/politics/articles/2018/01/28/749164-zabastovka-izbiratelei#%2Fgalleries%2F140737493734112%2Fnormal%2F4
285	111	2018-01-28	Novosibirsk	Poster			без меня! # это не выборы	boycott; elections	boycott; elections	https://www.kommersant.ru/photo/category_in/101824?id2=37
309	111	2018-01-28	Tyumen	Poster			без меня! # это не выборы	boycott; elections	boycott; elections	https://www.vedomosti.ru/politics/articles/2018/01/28/749182-zabastovka#%2Fgalleries%2F140737493734267%2Ffullscreen%2F6
158	77	2017-06-12	Kazan	Poster	Medvedev; speech bubble	Medvedev	без победы над коррупцией не добьемся ничего	corruption	Medvedev; corruption	https://www.kommersant.ru/photo/photo/923223
38	23	2017-03-26	Kazan	Poster	Medvedev; mute icon	Medvedev; silence; response	Бесшумный режим = преступный режим	silence; response; crime	silence; response; crime; Medvedev	https://www.rbc.ru/photoreport/26/03/2017/58d7ab1c9a7947392f2a664a
39	23	2017-03-26	Moscow	Poster	Medvedev; mute icon	Medvedev; silence; response	Бесшумный режим = преступный режим	silence; response; crime	silence; response; crime; Medvedev	https://meduza.io/live/2017/03/26/aktsii-protiv-korruptsii-po-vsey-rossii-hronika	https://twitter.com/GraniTweet/status/845943949877563392
71	23	2017-03-26	Nizhny Novgorod	Poster	Medvedev; mute icon	Medvedev; silence; response	Бесшумный режим = преступный режим	silence; response; crime	silence; response; crime; Medvedev	https://www.kommersant.ru/photo/category_in/76007?id2=34
93	23	2017-03-26	Novosibirsk	Poster	Medvedev; mute icon	Medvedev; silence; response	Бесшумный режим = преступный режим	silence; response; crime	silence; response; crime; Medvedev	https://www.kommersant.ru/photo/photo/661899
156	23	2017-06-12	Kazan	Poster	Medvedev; mute icon	Medvedev; silence; response	Бесшумный режим = преступный режим	silence; response; crime	silence; response; crime; Medvedev	https://www.kommersant.ru/photo/photo/923223
185	23	2017-06-12	Kazan	Poster	Medvedev; mute icon	Medvedev; silence; response	Бесшумный режим = преступный режим	silence; response; crime	silence; response; crime; Medvedev	https://www.kommersant.ru/photo/photo/923223
18	13	2017-03-26	Saint Petersburg	Flag	Vesna Movement flag	Vesna Movement	ВЕСНА! Молодежное движение	Vesna Movement	Vesna Movement	https://www.vedomosti.ru/politics/galleries/2017/03/26/682733-protiv-v-sankt-peterburge#/galleries/140737493196005/fullscreen/1
213	13	2017-10-07	Perm	Flag	Vesna Movement flag	Vesna Movement	ВЕСНА! Молодежное движение	Vesna Movement	Vesna Movement	https://www.kommersant.ru/photo/photo/957051
250	13	2018-01-28	Saint Petersburg	Flag	Vesna Movement flag	Vesna Movement	ВЕСНА! Молодежное движение	Vesna Movement	Vesna Movement	https://www.kommersant.ru/photo/photo/1004922
316	13	2017-03-26	Izhevsk	Flag	Vesna Movement flag	Vesna Movement	ВЕСНА! Молодежное движение	Vesna Movement	Vesna Movement	https://www.vedomosti.ru/politics/galleries/2017/03/26/682733-protiv-v-sankt-peterburge#/galleries/140737493196005/fullscreen/1
116	50	2017-06-12	Nizhny Novgorod	Poster			Врал? Воровал? Пора уходить	corruption; lie; resignation	corruption; lie; resignation	https://www.kommersant.ru/photo/photo/987534
189	50	2017-06-12	Barnaul	Poster			Врал? Воровал? Пора уходить	corruption; lie; resignation	corruption; lie; resignation	https://www.vedomosti.ru/politics/galleries/2017/06/12/693997-rossiya-protiv-korruptsii#/galleries/140737493327853/fullscreen/2
242	96	2017-10-07	Barnaul	Poster			выборы - это дебаты, а не обыски и аресты # за навального	Navalny; elections; repressions	Navalny; elections; repressions	https://meduza.io/feature/2017/10/07/7-oktyabrya-protesty-v-rossii-fotografii-po-kotorym-my-zapomnim-etot-den
243	96	2017-10-07	Moscow	Poster			выборы - это дебаты, а не обыски и аресты # за навального	Navalny; elections; repressions	Navalny; elections; repressions	https://iz.ru/655598/2017-10-07/mvd-soobshchaet-o-700-uchastnikakh-nesanktcionirovannoi-aktcii-v-moskve
178	82	2017-06-12	Samara	Poster			где деньги, дим?	money; Medvedev	money; Medvedev	https://www.novayagazeta.ru/articles/2017/06/12/72778-gde-bolshe-vsego-zaderzhannyh-u-kogo-samaya-krupnaya-utochka-i-chto-ukral-navalnyy
142	68	2017-06-12	Tomsk	Poster	Putin; Sechin; Kadyrov	Putin; Sechin; Kadyrov	геннадий тимченко надоел! надоел!	Timchenko	Putin; Sechin; Kadyrov; Usmanov	https://www.kommersant.ru/photo/photo/923685
162	79	2017-06-12	Yekaterinburg	Poster			димон, откуда деньги на Тоскану	Medvedev; corruption	Medvedev; corruption	https://www.kommersant.ru/photo/photo/923096
91	79	2017-03-26	Novosibirsk	Poster			димон, откуда деньги на Тоскану	Medvedev; corruption	Medvedev; corruption	https://www.kommersant.ru/photo/photo/661899
171	79	2017-06-12	Yekaterinburg	Poster			димон, откуда деньги на Тоскану	Medvedev; corruption	Medvedev; corruption	https://www.novayagazeta.ru/articles/2017/06/12/72778-gde-bolshe-vsego-zaderzhannyh-u-kogo-samaya-krupnaya-utochka-i-chto-ukral-navalnyy
188	79	2017-06-12	Barnaul	Poster			димон, откуда деньги на Тоскану	Medvedev; corruption	Medvedev; corruption	https://www.vedomosti.ru/politics/galleries/2017/06/12/693997-rossiya-protiv-korruptsii#/galleries/140737493327853/fullscreen/2
87	38	2017-03-26	Nizhny Novgorod	Poster	duck	corruption; Medvedev	Дмитрий Анатольевич, вас не слышно	Medvedev; response; silence	Medvedev; response; silence; corruption	https://www.kommersant.ru/photo/category_in/76007?id2=34
88	38	2017-03-26	Novosibirsk	Poster	duck	corruption; Medvedev	Дмитрий Анатольевич, вас не слышно	Medvedev; response; silence	Medvedev; response; silence; corruption	https://www.kommersant.ru/photo/photo/661899
113	38	2017-06-12	Nizhny Novgorod	Poster	duck	corruption; Medvedev	Дмитрий Анатольевич, вас не слышно	Medvedev; response; silence	Medvedev; response; silence; corruption	https://www.kommersant.ru/photo/photo/987534
139	65	2017-06-12	Tomsk	Poster	Putin; Sechin; Kadyrov	Putin; Sechin; Kadyrov	дмитрий медведев надоел! надоел!	Medvedev	Putin; Sechin; Kadyrov; Medvedev	https://www.kommersant.ru/photo/photo/923685
283	109	2018-01-28	Novosibirsk	Poster			долой осетрину четвертой свежести! # это не выборы	boycott; elections; Putin	boycott; elections; Putin	https://www.kommersant.ru/photo/category_in/101824?id2=37
15	10	2017-03-26	Moscow	Poster			Жалкий. Трусливый. Вор.	corruption; Medvedev	corruption; Medvedev	https://www.vedomosti.ru/politics/galleries/2017/03/26/682728-protiv-v-moskve#/galleries/140737493195934/normal/5
25	17	2017-03-26	Vladivostok	Poster	duck	corruption; Medvedev	Жалкий. Трусливый. Вор.	corruption; Medvedev	corruption; Medvedev	https://www.rbc.ru/photoreport/26/03/2017/58d7ab1c9a7947392f2a664a
31	17	2017-03-26	Saint Petersburg	Poster	duck	corruption; Medvedev	Жалкий. Трусливый. Вор.	corruption; Medvedev	corruption; Medvedev	http://www.fontanka.ru/2017/03/26/060/report.2.html#/?3
51	17	2017-03-26	Novosibirsk	Poster	duck	corruption; Medvedev	Жалкий. Трусливый. Вор.	corruption; Medvedev	corruption; Medvedev	http://www.interfax.ru/russia/555372	https://twitter.com/navalny/status/845922668109017088/photo/1?ref_src=twsrc%5Etfw&ref_url=http%3A%2F%2Fwww.interfax.ru%2Frussia%2F555372
169	17	2017-06-12	Moscow	Poster	duck	corruption; Medvedev	Жалкий. Трусливый. Вор.	corruption; Medvedev	corruption; Medvedev	https://www.novayagazeta.ru/articles/2017/06/12/72778-gde-bolshe-vsego-zaderzhannyh-u-kogo-samaya-krupnaya-utochka-i-chto-ukral-navalnyy
54	25	2017-03-26	Saint Petersburg	Poster	duck	corruption; Medvedev	Жалкий. Трусливый. Вор.	corruption; Medvedev	corruption; Medvedev	https://www.kommersant.ru/gallery/3253984#id=1405197
86	25	2017-03-26	Novosibirsk	Poster	duck	corruption; Medvedev	Жалкий. Трусливый. Вор.	corruption; Medvedev	corruption; Medvedev	https://www.kommersant.ru/photo/photo/661899
160	25	2017-06-12	Yekaterinburg	Poster	duck	corruption; Medvedev	Жалкий. Трусливый. Вор.	corruption; Medvedev	corruption; Medvedev	https://www.kommersant.ru/photo/photo/923096
187	25	2017-06-12	Barnaul	Poster	duck	corruption; Medvedev	Жалкий. Трусливый. Вор.	corruption; Medvedev	corruption; Medvedev	https://www.vedomosti.ru/politics/galleries/2017/06/12/693997-rossiya-protiv-korruptsii#/galleries/140737493327853/fullscreen/2
65	31	2017-03-26	Nizhny Novgorod	Poster			Жалкий. Трусливый. Вор.	corruption; Medvedev	corruption; Medvedev	https://www.kommersant.ru/photo/category_in/76007?id2=34
89	31	2017-03-26	Novosibirsk	Poster			Жалкий. Трусливый. Вор.	corruption; Medvedev	corruption; Medvedev	https://www.kommersant.ru/photo/photo/661899
123	53	2017-06-12	Novosibirsk	"Cube"			Жалкий. Трусливый. Вор.	corruption; Medvedev	corruption; Medvedev	https://www.kommersant.ru/photo/photo/923958
177	81	2017-06-12	Samara	Poster	fist		жить, а не держаться	money; life; Medvedev	money; life; Medvedev	https://www.novayagazeta.ru/articles/2017/06/12/72778-gde-bolshe-vsego-zaderzhannyh-u-kogo-samaya-krupnaya-utochka-i-chto-ukral-navalnyy
247	97	2018-01-28	Saint Petersburg	Poster	!	Navalny; elections	забастовка это восклицательный знак держите его вертикально	boycott; elections	boycott; Navalny; elections	https://www.kommersant.ru/photo/category_in/101848?id2=37
256	97	2018-01-28	Moscow	Poster	!	Navalny; elections	забастовка это восклицательный знак держите его вертикально	boycott; elections	boycott; Navalny; elections	https://www.kommersant.ru/photo/photo/1004772
263	97	2018-01-28	Samara	Poster	!	Navalny; elections	забастовка это восклицательный знак держите его вертикально	boycott; elections	boycott; Navalny; elections	https://www.kommersant.ru/photo/category_in/101829?id2=37
270	97	2018-01-28	Yekaterinburg	Poster	!	Navalny; elections	забастовка это восклицательный знак держите его вертикально	boycott; elections	boycott; Navalny; elections	https://www.kommersant.ru/photo/category_in/101833?id2=37
273	97	2018-01-28	Nizhny Novgorod	Poster	!	Navalny; elections	забастовка это восклицательный знак держите его вертикально	boycott; elections	boycott; Navalny; elections	https://www.kommersant.ru/photo/category_in/101828?id2=37
292	97	2018-01-28	Omsk	Poster	!	Navalny; elections	забастовка это восклицательный знак держите его вертикально	boycott; elections	boycott; Navalny; elections	https://www.novayagazeta.ru/articles/2018/01/28/75298-zabastovka-izbirateley-28-yanvarya-onlayn
312	97	2018-01-28	Tyumen	Poster	!	Navalny; elections	забастовка это восклицательный знак держите его вертикально	boycott; elections	boycott; Navalny; elections	https://www.vedomosti.ru/politics/articles/2018/01/28/749182-zabastovka#%2Fgalleries%2F140737493734267%2Ffullscreen%2F6
258	102	2018-01-28	Saint Petersburg	Badge			команда Навального	Navalny; elections	Navalny; elections	https://www.kommersant.ru/photo/category_in/101839?id2=37
259	102	2018-01-28	Moscow	Badge			команда Навального	Navalny; elections	Navalny; elections	https://www.kommersant.ru/photo/photo/1004772
2	2	2017-03-26	Vladivostok	Poster	duck	corruption; Medvedev	коррупция ворует будущее	corruption; future	corruption; future; Medvedev	https://www.vedomosti.ru/opinion/articles/2017/03/28/682965-kto-molodezh
3	2	2017-03-26	Novosibirsk	Poster	duck	corruption; Medvedev	коррупция ворует будущее	corruption; future	corruption; future; Medvedev	https://www.vedomosti.ru/opinion/articles/2017/03/28/682965-kto-molodezh
14	2	2017-03-26	Moscow	Poster	duck	corruption; Medvedev	коррупция ворует будущее	corruption; future	corruption; future; Medvedev	https://www.vedomosti.ru/politics/galleries/2017/03/26/682728-protiv-v-moskve#/galleries/140737493195934/normal/5
20	2	2017-03-26	Saint Petersburg	Poster	duck	corruption; Medvedev	коррупция ворует будущее	corruption; future	corruption; future; Medvedev	https://www.vedomosti.ru/politics/galleries/2017/03/26/682733-protiv-v-sankt-peterburge#/galleries/140737493196005/fullscreen/7
74	2	2017-03-26	Barnaul	Poster	duck	corruption; Medvedev	коррупция ворует будущее	corruption; future	corruption; future; Medvedev	https://www.kommersant.ru/photo/category_in/96077?id2=37
167	2	2017-06-12	Moscow	Poster	duck	corruption; Medvedev	коррупция ворует будущее	corruption; future	corruption; future; Medvedev	https://www.novayagazeta.ru/articles/2017/06/12/72778-gde-bolshe-vsego-zaderzhannyh-u-kogo-samaya-krupnaya-utochka-i-chto-ukral-navalnyy
4	3	2017-03-26	Novosibirsk	Poster	duck	corruption; Medvedev	коррупция ворует будущее	corruption; future	corruption; future; Medvedev	https://www.vedomosti.ru/opinion/articles/2017/03/28/682965-kto-molodezh
21	3	2017-03-26	Saint Petersburg	Poster	duck	corruption; Medvedev	коррупция ворует будущее	corruption; future	corruption; future; Medvedev	https://www.vedomosti.ru/politics/galleries/2017/03/26/682733-protiv-v-sankt-peterburge#/galleries/140737493196005/fullscreen/7
36	3	2017-03-26	Irkutsk	Poster	duck	corruption; Medvedev	коррупция ворует будущее	corruption; future	corruption; future; Medvedev	https://meduza.io/live/2017/03/26/aktsii-protiv-korruptsii-po-vsey-rossii-hronika	https://twitter.com/FlashSiberia/status/845904411868237825?ref_src=twsrc%5Etfw&ref_url=https%3A%2F%2Fmeduza.io%2Flive%2F2017%2F03%2F26%2Faktsii-protiv-korruptsii-po-vsey-rossii-hronika
56	3	2017-03-26	Yekaterinburg	Poster	duck	corruption; Medvedev	коррупция ворует будущее	corruption; future	corruption; future; Medvedev	https://meduza.io/feature/2017/03/27/ot-peterburga-do-vladivostoka-vserossiyskaya-aktsiya-protesta-v-fotografiyah
64	3	2017-03-26	Nizhny Novgorod	Poster	duck	corruption; Medvedev	коррупция ворует будущее	corruption; future	corruption; future; Medvedev	https://www.kommersant.ru/photo/category_in/76007?id2=34
79	3	2017-03-26	Kazan	Poster	duck	corruption; Medvedev	коррупция ворует будущее	corruption; future	corruption; future; Medvedev	https://www.kommersant.ru/photo/photo/710729
110	3	2017-06-12	Moscow	Poster	duck	corruption; Medvedev	коррупция ворует будущее	corruption; future	corruption; future; Medvedev	https://www.kommersant.ru/photo/photo/970416
77	35	2017-03-26	Tomsk	Poster	duck	corruption; Medvedev	коррупция ворует будущее	corruption; future	corruption; future; Medvedev	https://www.kommersant.ru/photo/category_in/78277?id2=34
115	49	2017-06-12	Nizhny Novgorod	Balloon	white, blue, red balloons	Russia	коррупция ворует будущее	corruption; future	corruption; future; Russia	https://www.kommersant.ru/photo/photo/987534
146	70	2017-06-12	Perm	Balloon			коррупция ворует будущее	corruption; future	corruption; future; Medvedev	https://www.kommersant.ru/photo/photo/923377
180	83	2017-06-12	Moscow	Poster			коррупция ворует будущее	corruption; future	corruption; future; Medvedev	https://www.rbc.ru/photoreport/12/06/2017/593e7ced9a79471913d11ee3
153	75	2017-06-12	Novosibirsk	Poster	Medvedev; speech bubble	Medvedev	коррупция должна стать неприличной	corruption	Medvedev; corruption	https://www.kommersant.ru/photo/photo/923958
154	75	2017-06-12	Kazan	Poster	Medvedev; speech bubble	Medvedev	коррупция должна стать неприличной	corruption	Medvedev; corruption	https://www.kommersant.ru/photo/photo/923223
203	75	2017-10-07	Moscow	Poster	Medvedev; speech bubble	Medvedev	коррупция должна стать неприличной	corruption	Medvedev; corruption	https://www.kommersant.ru/photo/photo/958104
267	105	2018-01-28	Samara	Poster			минус один! # забастовка	boycott; elections	boycott; elections	https://www.kommersant.ru/photo/category_in/101829?id2=37
268	106	2018-01-28	Samara	Poster			мне некого выбирать! # забастовка	boycott; elections	boycott; elections	https://www.kommersant.ru/photo/category_in/101829?id2=37
11	8	2017-03-26	Chelyabinsk	Poster			Мы злые, и настроение у нас так себе	money; anger	money; anger	https://www.vedomosti.ru/opinion/articles/2017/03/28/682965-kto-molodezh
27	8	2017-03-26	Vladivostok	Poster			Мы злые, и настроение у нас так себе	money; anger	money; anger	https://www.rbc.ru/photoreport/26/03/2017/58d7ab1c9a7947392f2a664a
34	8	2017-03-26	Novosibirsk	Poster			Мы злые, и настроение у нас так себе	money; anger	money; anger	https://meduza.io/live/2017/03/26/aktsii-protiv-korruptsii-po-vsey-rossii-hronika	https://twitter.com/vvo3000/status/845887888747196416/photo/1?ref_src=twsrc%5Etfw&ref_url=https%3A%2F%2Fmeduza.io%2Flive%2F2017%2F03%2F26%2Faktsii-protiv-korruptsii-po-vsey-rossii-hronika
81	8	2017-03-26	Perm	Poster			Мы злые, и настроение у нас так себе	money; anger	money; anger	https://www.kommersant.ru/photo/photo/662108
161	8	2017-06-12	Yekaterinburg	Poster			Мы злые, и настроение у нас так себе	money; anger	money; anger	https://www.kommersant.ru/photo/photo/923096
76	34	2017-03-26	Tomsk	Poster			Мы злые, и настроение у нас так себе	money; anger	money; anger	https://www.kommersant.ru/photo/category_in/78277?id2=34
17	12	2017-03-26	Moscow	Sticker			Н !	Navalny; elections	Navalny; elections	https://www.vedomosti.ru/politics/galleries/2017/03/26/682728-protiv-v-moskve#/galleries/140737493195934/normal/5
221	12	2017-10-07	Moscow	Sticker			Н !	Navalny; elections	Navalny; elections	https://www.vedomosti.ru/politics/galleries/2017/10/07/736946-aktsiya-navalnogo-moskve#/galleries/140737493585434/fullscreen/21
129	57	2017-06-12	Novosibirsk	Sticker			Н !	Navalny; elections	Navalny; elections	https://www.kommersant.ru/photo/photo/923958
257	101	2018-01-28	Moscow	Poster	flag of Russia	Russia	Н ! Забастовка	Navalny; elections; boycott	Navalny; elections; boycott; Russia	https://www.kommersant.ru/photo/photo/1004772
304	101	2018-01-28	Omsk	Poster	flag of Russia	Russia	Н ! Забастовка	Navalny; elections; boycott	Navalny; elections; boycott; Russia	https://www.vedomosti.ru/politics/articles/2018/01/28/749182-zabastovka#%2Fgalleries%2F140737493734267%2Ffullscreen%2F7
49	24	2017-03-26	Moscow	Poster	bear; fire	Medvedev; corruption; United Russia	На медведе шапка горит	Medvedev; corruption; United Russia	Medvedev; corruption; United Russia	https://meduza.io/live/2017/03/26/aktsii-protiv-korruptsii-po-vsey-rossii-hronika	https://twitter.com/GraniTweet/status/845943949877563392
68	24	2017-03-26	Novosibirsk	Poster	bear; fire	Medvedev; corruption; United Russia	На медведе шапка горит	Medvedev; corruption; United Russia	Medvedev; corruption; United Russia	https://www.kommersant.ru/photo/photo/661899
72	24	2017-03-26	Nizhny Novgorod	Poster	bear; fire	Medvedev; corruption; United Russia	На медведе шапка горит	Medvedev; corruption; United Russia	Medvedev; corruption; United Russia	https://www.kommersant.ru/photo/category_in/76007?id2=34
195	85	2017-06-12	Irkutsk	Poster			навальный	Navalny; elections	Navalny; elections	https://www.kommersant.ru/doc/3324044?from=doc_vrez	https://twitter.com/newsbabr/status/874208840924975105
252	85	2018-01-28	Moscow	Poster			навальный	Navalny; elections	Navalny; elections	https://www.kommersant.ru/photo/photo/1004839
12	9	2017-03-26	Moscow	Sticker	red circle		Навальный 20!8	Navalny; elections	Navalny; elections	https://www.vedomosti.ru/politics/galleries/2017/03/26/682728-protiv-v-moskve#/galleries/140737493195934/normal/4
52	9	2017-03-26	Samara	Sticker	red circle		Навальный 20!8	Navalny; elections	Navalny; elections	https://lenta.ru/articles/2017/03/28/protest/
111	9	2017-06-12	Nizhny Novgorod	Sticker	red circle		Навальный 20!8	Navalny; elections	Navalny; elections	https://www.kommersant.ru/photo/photo/987534
147	9	2017-06-12	Saint Petersburg	Sticker	red circle		Навальный 20!8	Navalny; elections	Navalny; elections	https://www.kommersant.ru/photo/photo/923528
155	9	2017-06-12	Kazan	Sticker	red circle		Навальный 20!8	Navalny; elections	Navalny; elections	https://www.kommersant.ru/photo/photo/923223
114	48	2017-06-12	Nizhny Novgorod	"Cube"			Навальный 20!8	Navalny; elections	Navalny; elections	https://www.kommersant.ru/photo/photo/987534
164	78	2017-06-12	Moscow	Sticker			Навальный 20!8	Navalny; elections	Navalny; elections	https://www.novayagazeta.ru/articles/2017/06/12/72771-den-rossii-protiv-korruptsii-v-regionah-prohodyat-aktsii-storonnikov-navalnogo-est-zaderzhannye
220	78	2017-10-07	Moscow	Sticker			Навальный 20!8	Navalny; elections	Navalny; elections	https://www.vedomosti.ru/politics/galleries/2017/10/07/736946-aktsiya-navalnogo-moskve#/galleries/140737493585434/fullscreen/13
198	87	2017-10-07	Saint Petersburg	Poster			Навальный 20!8	Navalny; elections	Navalny; elections	http://visualrian.ru/story/list_556772/3207871.html
206	87	2017-10-07	Yekaterinburg	Poster			Навальный 20!8	Navalny; elections	Navalny; elections	https://www.kommersant.ru/photo/photo/957969
218	87	2017-10-07	Moscow	Poster			Навальный 20!8	Navalny; elections	Navalny; elections	https://www.vedomosti.ru/politics/galleries/2017/10/07/736946-aktsiya-navalnogo-moskve#/galleries/140737493585434/fullscreen/2
225	87	2017-10-07	Vladivostok	Poster			Навальный 20!8	Navalny; elections	Navalny; elections	https://www.novayagazeta.ru/articles/2017/10/07/74099-aktsii-storonnikov-navalnogo-v-desyatkah-gorodov-rossii
239	87	2017-10-07	Omsk	Poster			Навальный 20!8	Navalny; elections	Navalny; elections	https://meduza.io/live/2017/10/07/kak-prohodyat-aktsii-v-podderzhku-navalnogo-po-vsey-rossii-onlayn	https://twitter.com/Victor_Korb/status/916614902328037376
248	87	2018-01-28	Saint Petersburg	Poster			Навальный 20!8	Navalny; elections	Navalny; elections	https://www.kommersant.ru/photo/category_in/101834?id2=37
280	87	2018-01-28	Perm	Poster			Навальный 20!8	Navalny; elections	Navalny; elections	https://www.kommersant.ru/photo/category_in/101826?id2=37
299	87	2018-01-28	Saratov	Poster			Навальный 20!8	Navalny; elections	Navalny; elections	https://www.novayagazeta.ru/articles/2018/01/29/75319-narod-peretaptyvaetsya
212	89	2017-10-07	Perm	Balloon			Навальный 20!8	Navalny; elections	Navalny; elections	https://www.kommersant.ru/photo/photo/957051
216	89	2017-10-07	Nizhny Novgorod	Balloon			Навальный 20!8	Navalny; elections	Navalny; elections	https://www.kommersant.ru/photo/photo/956997
224	89	2017-10-07	Chelyabinsk	Balloon			Навальный 20!8	Navalny; elections	Navalny; elections	https://meduza.io/live/2017/10/07/kak-prohodyat-aktsii-v-podderzhku-navalnogo-po-vsey-rossii-onlayn	https://twitter.com/so_destroyed/status/916621555630735361
228	89	2017-10-07	Novosibirsk	Balloon			Навальный 20!8	Navalny; elections	Navalny; elections	https://www.novayagazeta.ru/articles/2017/10/07/74099-aktsii-storonnikov-navalnogo-v-desyatkah-gorodov-rossii	https://twitter.com/teamnavalny/status/916608227424514048/photo/1
234	89	2017-10-07	Vladivostok	Balloon			Навальный 20!8	Navalny; elections	Navalny; elections	https://www.novayagazeta.ru/articles/2017/10/07/74099-aktsii-storonnikov-navalnogo-v-desyatkah-gorodov-rossii	https://twitter.com/aegorev/status/916604418145087488/photo/1
237	89	2017-10-07	Irkutsk	Balloon			Навальный 20!8	Navalny; elections	Navalny; elections	https://meduza.io/live/2017/10/07/kak-prohodyat-aktsii-v-podderzhku-navalnogo-po-vsey-rossii-onlayn	https://twitter.com/evishnjakova/status/916620247431630849
238	89	2017-10-07	Omsk	Balloon			Навальный 20!8	Navalny; elections	Navalny; elections	https://meduza.io/live/2017/10/07/kak-prohodyat-aktsii-v-podderzhku-navalnogo-po-vsey-rossii-onlayn	https://twitter.com/evishnjakova/status/916620247431630849
102	43	2017-04-29	Saint Petersburg	Balloon	spruce		надоел		Putin; elections	https://www.kommersant.ru/photo/photo/904145
104	44	2017-04-29	Tomsk	Poster	Putin; yellow tape	Putin	надоел	Putin; elections	Putin; elections	https://www.kommersant.ru/photo/photo/904073
105	45	2017-04-29	Moscow	Sticker	yellow tape		надоело! надоело!	Putin; elections	Putin; elections	https://www.novayagazeta.ru/articles/2017/04/29/72335-lyudi-s-trebovaniyami
106	45	2017-04-29	Barnaul	Sticker	yellow tape		надоело! надоело!	Putin; elections	Putin; elections	https://www.kommersant.ru/photo/photo/904055
264	103	2018-01-28	Samara	Poster			не ведусь! # забастовка	boycott; elections	boycott; elections	https://www.kommersant.ru/photo/category_in/101829?id2=37
22	15	2017-03-26	Saint Petersburg	Balloon	Red balloon	Navalny	Не воровать не врать	corruption; lie	Navalny; corruption; lie	https://www.kommersant.ru/gallery/3253984#id=1405206
207	15	2017-10-07	Yekaterinburg	Balloon	Red balloon	Navalny	Не воровать не врать	corruption; lie	Navalny; corruption; lie	https://www.kommersant.ru/photo/photo/957969
208	15	2017-10-07	Saint Petersburg	Balloon	Red balloon	Navalny	Не воровать не врать	corruption; lie	Navalny; corruption; lie	https://www.kommersant.ru/photo/photo/957343
29	20	2017-03-26	Saint Petersburg	Sticker	circle	Navalny	Не воровать не врать	corruption; lie	corruption; lie	http://www.fontanka.ru/2017/03/26/060/report.2.html#/?0
209	20	2017-10-07	Saint Petersburg	Sticker	circle	Navalny	Не воровать не врать	corruption; lie	corruption; lie	https://www.kommersant.ru/photo/photo/957308
30	21	2017-03-26	Saint Petersburg	Sticker	circle		Не воровать не врать	corruption; lie	corruption; lie	http://www.fontanka.ru/2017/03/26/060/report.2.html#/?0
55	26	2017-03-26	Saint Petersburg	Sticker	circle		Не воровать не врать	corruption; lie	corruption; lie	https://www.kommersant.ru/gallery/3253984#id=1405197
61	30	2017-03-26	Saint Petersburg	Sticker	circle		не врать	lie	lie	http://novayagazeta.spb.ru/reports/289/
284	110	2018-01-28	Novosibirsk	Poster			не выборы, не приду! # это не выборы	boycott; elections	boycott; elections	https://www.kommersant.ru/photo/category_in/101824?id2=37
306	110	2018-01-28	Omsk	Poster			не выборы, не приду! # это не выборы	boycott; elections		https://www.vedomosti.ru/politics/articles/2018/01/28/749182-zabastovka#%2Fgalleries%2F140737493734267%2Ffullscreen%2F7
16	11	2017-03-26	Moscow	Sticker	Artpodgotovka logo	Artpodgotovka	Не ждем, а готовимся!	revolution	revolution; Artpodgotovka	https://www.vedomosti.ru/politics/galleries/2017/03/26/682728-protiv-v-moskve#/galleries/140737493195934/normal/5
210	11	2017-10-07	Saint Petersburg	Sticker	Artpodgotovka logo	Artpodgotovka	Не ждем, а готовимся!	revolution	revolution; Artpodgotovka	https://www.kommersant.ru/photo/photo/957308
235	11	2017-10-07	Saint Petersburg	Sticker	Artpodgotovka logo	Artpodgotovka	Не ждем, а готовимся!	revolution	revolution; Artpodgotovka	https://www.novayagazeta.ru/articles/2017/10/07/74110-nerazreshennyy-miting-gulyaniya-zaderzhaniya-fotografii
130	58	2017-06-12	Novosibirsk	Poster	Navalny	Navalny	новосибирск против коррупции навальный 20!8 пора выбирать	Navalny; elections; corruption; Novosibirsk		https://www.kommersant.ru/photo/photo/923958
98	39	2017-04-29	Yekaterinburg	Flag			ОПР Объединение перевозчиков России	truckers; Platon	truckers; Platon	https://www.rbc.ru/politics/29/04/2017/5904a17d9a794738f9b8b544
6	4	2017-03-26	Yekaterinburg	Flag	bull	PARNAS	Партия народной свободы	PARNAS	PARNAS	https://www.vedomosti.ru/opinion/articles/2017/03/28/682965-kto-molodezh
32	4	2017-03-26	Perm	Flag	bull	PARNAS	Партия народной свободы	PARNAS	PARNAS	https://www.novayagazeta.ru/articles/2017/03/26/71913-na-antipravitelstvennyh-mitingah-v-rossii-zaderzhivayut-lyudey-onlayn
9	6	2017-03-26	Ufa	Flag	Progress Party logo	Progress Party	Партия прогресса	Progress Party	Progress Party	https://www.vedomosti.ru/opinion/articles/2017/03/28/682965-kto-molodezh
175	6	2017-06-12	Samara	Flag	Progress Party logo	Progress Party	Партия прогресса	Progress Party	Progress Party	https://www.novayagazeta.ru/articles/2017/06/12/72778-gde-bolshe-vsego-zaderzhannyh-u-kogo-samaya-krupnaya-utochka-i-chto-ukral-navalnyy
182	6	2017-06-12	Izhevsk	Flag	Progress Party logo	Progress Party	Партия прогресса	Progress Party	Progress Party	https://www.rbc.ru/photoreport/12/06/2017/593e682c9a7947137d508a52
10	7	2017-03-26	Ufa	"Cube"	Progress Party logo	Progress Party	Партия прогресса	Progress Party	Progress Party	https://www.vedomosti.ru/opinion/articles/2017/03/28/682965-kto-molodezh
143	69	2017-06-12	Tomsk	Poster			позор той власти которая покрывает беспредел!	shame; violations	shame; violations	https://www.kommersant.ru/photo/photo/923685
286	112	2018-01-28	Novosibirsk	Poster			пойду на выборы, когда будет выбор! # забастовка	boycott; elections	boycott; elections	https://www.kommersant.ru/photo/category_in/101824?id2=37
290	112	2018-01-28	Moscow	Poster			пойду на выборы, когда будет выбор! # забастовка	boycott; elections	boycott; elections	https://www.rbc.ru/photoreport/28/01/2018/5a6dd54c9a7947b08da30aa6
222	92	2017-10-07	Moscow	Sticker			пора выбирать навальный 20!8	Navalny; elections	Navalny; elections	https://www.vedomosti.ru/politics/galleries/2017/10/07/736946-aktsiya-navalnogo-moskve#/galleries/140737493585434/fullscreen/26
24	16	2017-03-26	Vladivostok	Poster			Продай дачи, построй дороги	corruption; roads	corruption; roads	https://www.rbc.ru/photoreport/26/03/2017/58d7ab1c9a7947392f2a664a
78	16	2017-03-26	Tomsk	Poster			Продай дачи, построй дороги	corruption; roads	corruption; roads	https://www.kommersant.ru/photo/category_in/78277?id2=34
90	16	2017-03-26	Novosibirsk	Poster			Продай дачи, построй дороги	corruption; roads	corruption; roads	https://www.kommersant.ru/photo/photo/661899
172	16	2017-06-12	Yekaterinburg	Poster			Продай дачи, построй дороги	corruption; roads	corruption; roads	https://www.novayagazeta.ru/articles/2017/06/12/72778-gde-bolshe-vsego-zaderzhannyh-u-kogo-samaya-krupnaya-utochka-i-chto-ukral-navalnyy
26	18	2017-03-26	Vladivostok	Poster	duck	corruption; Medvedev	Продай дачи, построй дороги	corruption; roads	corruption; roads; Medvedev	https://www.rbc.ru/photoreport/26/03/2017/58d7ab1c9a7947392f2a664a
57	18	2017-03-26	Tomsk	Poster	duck	corruption; Medvedev	Продай дачи, построй дороги	corruption; roads	corruption; roads; Medvedev	https://meduza.io/feature/2017/03/27/ot-peterburga-do-vladivostoka-vserossiyskaya-aktsiya-protesta-v-fotografiyah
66	18	2017-03-26	Nizhny Novgorod	Poster	duck	corruption; Medvedev	Продай дачи, построй дороги	corruption; roads	corruption; roads; Medvedev	https://www.kommersant.ru/photo/category_in/76007?id2=34
84	18	2017-03-26	Yekaterinburg	Poster	duck	corruption; Medvedev	Продай дачи, построй дороги	corruption; roads	corruption; roads; Medvedev	https://www.kommersant.ru/photo/photo/661904
159	18	2017-06-12	Yekaterinburg	Poster	duck	corruption; Medvedev	Продай дачи, построй дороги	corruption; roads	corruption; roads; Medvedev	https://www.kommersant.ru/photo/photo/923096
67	32	2017-03-26	Nizhny Novgorod	Poster	duck	corruption; Medvedev	Продай дачи, построй дороги	corruption; roads	corruption; roads; Medvedev	https://www.kommersant.ru/photo/category_in/76007?id2=34
75	32	2017-03-26	Tomsk	Poster	duck	corruption; Medvedev	Продай дачи, построй дороги	corruption; roads	corruption; roads; Medvedev	https://www.kommersant.ru/photo/category_in/78277?id2=34
134	61	2017-06-12	Tomsk	Poster	Putin; Sechin; Kadyrov	Putin; Sechin; Kadyrov	рамзан кадыров надоел! надоел!	Kadyrov	Putin; Sechin; Kadyrov	https://www.kommersant.ru/photo/photo/923685
254	100	2018-01-28	Moscow	Poster			Сам не иду и вам не советую! # забастовка	boycott; elections	boycott; elections	https://www.kommersant.ru/photo/photo/1004839
288	100	2018-01-28	Novosibirsk	Poster			Сам не иду и вам не советую! # забастовка	boycott; elections	boycott; elections	https://www.kommersant.ru/photo/category_in/101824?id2=37
37	22	2017-03-26	Kazan	Poster	fist	resistance	Сами вы "Держитесь"	Medvedev; money	Medvedev; money; resistance	https://www.rbc.ru/photoreport/26/03/2017/58d7ab1c9a7947392f2a664a
53	22	2017-03-26	Moscow	Poster	fist	resistance	Сами вы "Держитесь"	Medvedev; money	Medvedev; money; resistance	https://lenta.ru/articles/2017/03/28/protest/
62	22	2017-03-26	Irkutsk	Poster	fist	resistance	Сами вы "Держитесь"	Medvedev; money	Medvedev; money; resistance	https://www.kommersant.ru/photo/photo/75998/661850
70	22	2017-03-26	Nizhny Novgorod	Poster	fist	resistance	Сами вы "Держитесь"	Medvedev; money	Medvedev; money; resistance	https://www.kommersant.ru/photo/category_in/76007?id2=34
92	22	2017-03-26	Novosibirsk	Poster	fist	resistance	Сами вы "Держитесь"	Medvedev; money	Medvedev; money; resistance	https://www.kommersant.ru/photo/photo/661899
186	22	2017-06-12	Saint Petersburg	Poster	fist	resistance	Сами вы "Держитесь"	Medvedev; money	Medvedev; money; resistance	https://www.vedomosti.ru/politics/galleries/2017/06/12/694013-antikorruptsionnii-miting-v-peterburge#/galleries/140737493328005/fullscreen/16
219	32	2017-10-07	Moscow	Poster			свободу выборам, свободу навальному # за навального	Navalny; elections; repressions	Navalny; elections; repressions	https://www.vedomosti.ru/politics/galleries/2017/10/07/736946-aktsiya-navalnogo-moskve#/galleries/140737493585434/fullscreen/4
240	32	2017-10-07	Nizhny Novgorod	Poster			свободу выборам, свободу навальному # за навального	Navalny; elections; repressions	Navalny; elections; repressions	https://meduza.io/live/2017/10/07/kak-prohodyat-aktsii-v-podderzhku-navalnogo-po-vsey-rossii-onlayn
184	84	2017-06-12	Chelyabinsk	Balloon			стоп гок	Tominsky GOK; environment	Tominsky GOK; environment	https://www.rbc.ru/photoreport/12/06/2017/593e682c9a7947137d508a52
138	64	2017-06-12	Tomsk	Banner	flag of Russia; duck	Medvedev; corruption; Russia	требуем ответов 12 июня ?!	corruption; response	Medvedev; corruption; Russia; response	https://www.kommersant.ru/photo/photo/923685
217	91	2017-10-07	Nizhny Novgorod	Poster			требую допуска навального до выборов # за навального	Navalny; elections	Navalny; elections	https://www.kommersant.ru/photo/photo/956997
245	91	2017-10-07	Barnaul	Poster			требую допуска навального до выборов # за навального	Navalny; elections	Navalny; elections	https://www.kommersant.ru/gallery/3433620#id=1495447
133	60	2017-06-12	Tomsk	Poster	"Не надо так" meme		ты крадешь наши деньги и несешь чушь про компот не надо так	"On vam ne Dimon"; corruption; response	"On vam ne Dimon"; corruption; response	https://www.kommersant.ru/photo/photo/923685
141	67	2017-06-12	Tomsk	Poster			участник массовой протестной голодовки	hunger strike	hunger strike	https://www.kommersant.ru/photo/photo/923685
82	36	2017-03-26	Samara	Badge			Фонд борьбы с коррупцией	FBK; Navalny	FBK; Navalny	https://www.kommersant.ru/photo/photo/662114
269	107	2018-01-28	Samara	Poster			хватит решать за меня! # забастовка	boycott; elections	boycott; elections	https://www.kommersant.ru/photo/category_in/101829?id2=37
279	107	2018-01-28	Perm	Poster			хватит решать за меня! # забастовка	boycott; elections	boycott; elections	https://www.kommersant.ru/photo/category_in/101826?id2=37
314	107	2018-01-28	Saint Petersburg	Poster			хватит решать за меня! # забастовка	boycott; elections	boycott; elections	https://www.vedomosti.ru/politics/galleries/2018/01/28/749188-zabastovka-izbiratelei-peterburge#/galleries/140737493734477/fullscreen/22
305	115	2018-01-28	Novosibirsk	Poster			это не выборы - это обман # это не выборы	elections; lie; boycott	elections; lie; boycott	https://www.vedomosti.ru/politics/articles/2018/01/28/749182-zabastovka#%2Fgalleries%2F140737493734267%2Ffullscreen%2F7
310	115	2018-01-28	Tyumen	Poster			это не выборы - это обман # это не выборы	elections; lie; boycott	elections; lie; boycott	https://www.vedomosti.ru/politics/articles/2018/01/28/749182-zabastovka#%2Fgalleries%2F140737493734267%2Ffullscreen%2F6
265	104	2018-01-28	Samara	Poster			этот цирк — без меня # забастовка	boycott; elections	boycott; elections	https://www.kommersant.ru/photo/category_in/101829?id2=37
277	104	2018-01-28	Perm	Poster			этот цирк — без меня # забастовка	boycott; elections	boycott; elections	https://www.kommersant.ru/photo/category_in/101826?id2=37
303	104	2018-01-28	Omsk	Poster			этот цирк — без меня # забастовка	boycott; elections	boycott; elections	https://www.vedomosti.ru/politics/articles/2018/01/28/749182-zabastovka#%2Fgalleries%2F140737493734267%2Ffullscreen%2F7
135	62	2017-06-12	Tomsk	Poster	Putin; Sechin; Kadyrov	Putin; Sechin; Kadyrov	юрий ковальчук надоел! надоел!	Kovalchuk	Putin; Sechin; Kadyrov; Kovalchuk	https://www.kommersant.ru/photo/photo/923685
151	73	2017-06-12	Nizhny Novgorod	Poster	Homunculus loxodontus	response	Я жду объяснений #ОнВамнеДимон	Medvedev; corruption; response	Medvedev; corruption; response	https://www.kommersant.ru/photo/photo/987534
176	73	2017-06-12	Samara	Poster	Homunculus loxodontus	response	Я жду объяснений #ОнВамнеДимон	Medvedev; corruption; response	Medvedev; corruption; response	https://www.novayagazeta.ru/articles/2017/06/12/72778-gde-bolshe-vsego-zaderzhannyh-u-kogo-samaya-krupnaya-utochka-i-chto-ukral-navalnyy
152	74	2017-06-12	Kazan	Poster	Homunculus loxodontus	response	Я жду объяснений #ОнВамнеДимон	Medvedev; corruption; response	Medvedev; corruption; response	https://www.kommersant.ru/photo/photo/923223
202	74	2017-10-07	Moscow	Poster	Homunculus loxodontus	response	Я жду объяснений #ОнВамнеДимон	Medvedev; corruption; response	Medvedev; corruption; response	https://www.kommersant.ru/photo/photo/958104
223	93	2017-10-07	Moscow	Poster			я здесь, потому что я # за навального	Navalny; elections	Navalny; elections	https://www.rbc.ru/photoreport/07/10/2017/59d8cf639a7947ca64e43db0
241	93	2017-10-07	Barnaul	Poster			я здесь, потому что я # за навального	Navalny; elections	Navalny; elections	https://meduza.io/feature/2017/10/07/7-oktyabrya-protesty-v-rossii-fotografii-po-kotorym-my-zapomnim-etot-den
69	33	2017-03-26	Nizhny Novgorod	Flag	flag of YABLOKO party	Yabloko	яблоко российская демократическая партия	Yabloko	Yabloko	https://www.kommersant.ru/photo/category_in/76007?id2=34
315	33	2017-03-26	Izhevsk	Flag	flag of YABLOKO party	Yabloko	яблоко российская демократическая партия	Yabloko	Yabloko
1	1	2017-03-26	Saint Petersburg	Flag	flag of Russia	Russia			Russia	https://www.spb.kp.ru/daily/26690.7/3714536/
5	1	2017-03-26	Yekaterinburg	Flag	flag of Russia	Russia			Russia	https://www.vedomosti.ru/opinion/articles/2017/03/28/682965-kto-molodezh
7	1	2017-03-26	Ufa	Flag	white; blue; red	Russia			Russia	https://www.vedomosti.ru/opinion/articles/2017/03/28/682965-kto-molodezh
13	1	2017-03-26	Moscow	Flag	flag of Russia	Russia			Russia	https://www.vedomosti.ru/politics/galleries/2017/03/26/682728-protiv-v-moskve#/galleries/140737493195934/normal/5
23	1	2017-03-26	Vladivostok	Flag	flag of Russia	Russia			Russia	https://www.rbc.ru/photoreport/26/03/2017/58d7ab1c9a7947392f2a664a
33	1	2017-03-26	Perm	Flag	flag of Russia	Russia			Russia	https://www.novayagazeta.ru/articles/2017/03/26/71913-na-antipravitelstvennyh-mitingah-v-rossii-zaderzhivayut-lyudey-onlayn
35	1	2017-03-26	Irkutsk	Flag	flag of Russia	Russia			Russia	https://meduza.io/live/2017/03/26/aktsii-protiv-korruptsii-po-vsey-rossii-hronika	https://twitter.com/FlashSiberia/status/845904411868237825?ref_src=twsrc%5Etfw&ref_url=https%3A%2F%2Fmeduza.io%2Flive%2F2017%2F03%2F26%2Faktsii-protiv-korruptsii-po-vsey-rossii-hronika
50	1	2017-03-26	Tomsk	Flag	flag of Russia	Russia			Russia	http://www.interfax.ru/russia/555372	https://twitter.com/Vorewig/status/845902000453758976?ref_src=twsrc%5Etfw&ref_url=http%3A%2F%2Fwww.interfax.ru%2Frussia%2F555372
63	1	2017-03-26	Nizhny Novgorod	Flag	flag of Russia	Russia			Russia	https://www.kommersant.ru/photo/category_in/76007?id2=34
73	1	2017-03-26	Barnaul	Flag	flag of Russia	Russia			Russia	https://www.kommersant.ru/photo/category_in/96077?id2=37
80	1	2017-03-26	Kazan	Flag	flag of Russia	Russia			Russia	https://www.kommersant.ru/photo/photo/710729
85	1	2017-03-26	Yekaterinburg	Flag	flag of Russia	Russia			Russia	https://www.kommersant.ru/photo/photo/661904
94	1	2017-03-26	Barnaul	Flag	flag of Russia	Russia			Russia	https://www.kommersant.ru/doc/3253851?from=doc_vrez	https://twitter.com/kosaretskii/status/845870574719127554/photo/1?ref_src=twsrc%5Etfw&ref_url=https%3A%2F%2Fwww.kommersant.ru%2Fdoc%2F3253851
95	1	2017-04-29	Tomsk	Flag	flag of Russia	Russia			Russia	https://www.rbc.ru/rbcfreenews/59046b7a9a7947270b97b757	https://twitter.com/openrussiateam/status/858269283767525376
97	1	2017-04-29	Yekaterinburg	Flag	flag of Russia	Russia			Russia	https://www.rbc.ru/politics/29/04/2017/5904a17d9a794738f9b8b544
103	1	2017-04-29	Tomsk	Flag	flag of Russia	Russia			Russia	https://www.kommersant.ru/photo/photo/904073
108	1	2017-06-12	Moscow	Flag	flag of Russia	Russia			Russia	http://www.interfax.ru/photo/3389/35563
112	1	2017-06-12	Nizhny Novgorod	Flag	flag of Russia	Russia			Russia	https://www.kommersant.ru/photo/photo/987534
118	1	2017-06-12	Saint Petersburg	Flag	flag of Russia	Russia			Russia	https://www.kommersant.ru/photo/photo/944506
120	1	2017-06-12	Barnaul	Flag	flag of Russia	Russia			Russia	https://www.kommersant.ru/photo/photo/923885
121	1	2017-06-12	Novosibirsk	Flag	flag of Russia	Russia			Russia	https://www.kommersant.ru/photo/photo/923958
131	1	2017-06-12	Novosibirsk	Flag	flag of Russia	Russia			Russia	https://www.kommersant.ru/photo/photo/923958
136	1	2017-06-12	Tomsk	Flag	flag of Russia	Russia			Russia	https://www.kommersant.ru/photo/photo/923685
144	1	2017-06-12	Perm	Flag	flag of Russia	Russia			Russia	https://www.kommersant.ru/photo/photo/923376
150	1	2017-06-12	Kazan	Flag	flag of Russia	Russia			Russia	https://www.kommersant.ru/photo/photo/923223
165	1	2017-06-12	Vladivostok	Flag	flag of Russia	Russia			Russia	https://www.novayagazeta.ru/articles/2017/06/12/72771-den-rossii-protiv-korruptsii-v-regionah-prohodyat-aktsii-storonnikov-navalnogo-est-zaderzhannye
166	1	2017-06-12	Samara	Flag	flag of Russia	Russia			Russia	https://www.novayagazeta.ru/articles/2017/06/12/72773-vladivostok-samara
170	1	2017-06-12	Yekaterinburg	Flag	flag of Russia	Russia			Russia	https://www.novayagazeta.ru/articles/2017/06/12/72778-gde-bolshe-vsego-zaderzhannyh-u-kogo-samaya-krupnaya-utochka-i-chto-ukral-navalnyy
173	1	2017-06-12	Vladivostok	Flag	flag of Russia	Russia			Russia	https://www.novayagazeta.ru/articles/2017/06/12/72778-gde-bolshe-vsego-zaderzhannyh-u-kogo-samaya-krupnaya-utochka-i-chto-ukral-navalnyy
174	1	2017-06-12	Irkutsk	Flag	flag of Russia	Russia			Russia	https://www.novayagazeta.ru/articles/2017/06/12/72778-gde-bolshe-vsego-zaderzhannyh-u-kogo-samaya-krupnaya-utochka-i-chto-ukral-navalnyy
181	1	2017-06-12	Izhevsk	Flag	flag of Russia	Russia			Russia	https://www.rbc.ru/photoreport/12/06/2017/593e682c9a7947137d508a52
183	1	2017-06-12	Chelyabinsk	Flag	flag of Russia	Russia			Russia	https://www.rbc.ru/photoreport/12/06/2017/593e682c9a7947137d508a52
190	1	2017-06-12	Barnaul	Flag	flag of Russia	Russia			Russia	https://www.vedomosti.ru/politics/galleries/2017/06/12/693997-rossiya-protiv-korruptsii#/galleries/140737493327853/fullscreen/2
192	1	2017-06-12	Tomsk	Flag	flag of Russia	Russia			Russia	https://www.vedomosti.ru/politics/galleries/2017/06/12/693997-rossiya-protiv-korruptsii#/galleries/140737493327853/fullscreen/9
193	1	2017-06-12	Omsk	Flag	flag of Russia	Russia			Russia	https://www.vedomosti.ru/politics/galleries/2017/06/12/693997-rossiya-protiv-korruptsii#/galleries/140737493327853/fullscreen/16
194	1	2017-06-12	Khabarovsk	Flag	flag of Russia	Russia			Russia	https://www.vedomosti.ru/politics/galleries/2017/06/12/693997-rossiya-protiv-korruptsii#/galleries/140737493327853/fullscreen/18
196	1	2017-06-12	Ufa	Flag	flag of Russia	Russia			Russia	https://www.kommersant.ru/doc/3324044?from=doc_vrez	https://twitter.com/Idel_Realii/status/874199796348841985/photo/1?ref_src=twsrc%5Etfw&ref_url=https%3A%2F%2Fwww.kommersant.ru%2Fdoc%2F3324044
199	1	2017-10-07	Saint Petersburg	Flag	flag of Russia	Russia			Russia	http://visualrian.ru/story/list_556772/3207930.html
200	1	2017-10-07	Chelyabinsk	Flag	flag of Russia	Russia			Russia	https://meduza.io/live/2017/10/07/kak-prohodyat-aktsii-v-podderzhku-navalnogo-po-vsey-rossii-onlayn
201	1	2017-10-07	Moscow	Flag	flag of Russia	Russia			Russia	http://visualrian.ru/story/list_556772/3207750.html
204	1	2017-10-07	Yekaterinburg	Flag	flag of Russia	Russia			Russia	https://www.kommersant.ru/photo/photo/957969
211	1	2017-10-07	Perm	Flag	flag of Russia	Russia			Russia	https://www.kommersant.ru/photo/photo/957051
215	1	2017-10-07	Nizhny Novgorod	Flag	flag of Russia	Russia			Russia	https://www.kommersant.ru/photo/photo/956997
226	1	2017-10-07	Vladivostok	Flag	flag of Russia	Russia			Russia	https://www.novayagazeta.ru/articles/2017/10/07/74099-aktsii-storonnikov-navalnogo-v-desyatkah-gorodov-rossii
227	1	2017-10-07	Novosibirsk	Flag	flag of Russia	Russia			Russia	https://www.novayagazeta.ru/articles/2017/10/07/74099-aktsii-storonnikov-navalnogo-v-desyatkah-gorodov-rossii	https://twitter.com/teamnavalny/status/916608227424514048/photo/1
233	1	2017-10-07	Khabarovsk	Flag	flag of Russia	Russia			Russia	https://www.novayagazeta.ru/articles/2017/10/07/74099-aktsii-storonnikov-navalnogo-v-desyatkah-gorodov-rossii	https://twitter.com/teamnavalny/status/916608227424514048/photo/1
236	1	2017-10-07	Irkutsk	Flag	flag of Russia	Russia			Russia	https://meduza.io/live/2017/10/07/kak-prohodyat-aktsii-v-podderzhku-navalnogo-po-vsey-rossii-onlayn	https://twitter.com/evishnjakova/status/916620247431630849
246	1	2018-01-28	Saint Petersburg	Flag	flag of Russia	Russia			Russia	https://www.kommersant.ru/photo/category_in/101834?id2=37
249	1	2018-01-28	Moscow	Flag	flag of Russia	Russia			Russia	https://www.kommersant.ru/photo/category_in/101855?id2=37
255	1	2018-01-28	Barnaul	Flag	flag of Russia	Russia			Russia	https://www.kommersant.ru/photo/category_in/101841?id2=37
262	1	2018-01-28	Samara	Flag	flag of Russia	Russia			Russia	https://www.kommersant.ru/photo/category_in/101829?id2=37
271	1	2018-01-28	Yekaterinburg	Flag	flag of Russia	Russia			Russia	https://www.kommersant.ru/photo/category_in/101833?id2=37
274	1	2018-01-28	Nizhny Novgorod	Flag	flag of Russia	Russia			Russia	https://www.kommersant.ru/photo/category_in/101828?id2=37
276	1	2018-01-28	Perm	Flag	flag of Russia	Russia			Russia	https://www.kommersant.ru/photo/category_in/101826?id2=37
282	1	2018-01-28	Novosibirsk	Flag	flag of Russia	Russia			Russia	https://www.kommersant.ru/photo/category_in/101824?id2=37
293	1	2018-01-28	Omsk	Flag	flag of Russia	Russia			Russia	https://www.novayagazeta.ru/articles/2018/01/28/75298-zabastovka-izbirateley-28-yanvarya-onlayn
296	1	2018-01-28	Tomsk	Flag	flag of Russia	Russia			Russia	https://meduza.io/live/2018/01/28/zabastovka-izbirateley-po-vsey-rossii-hronika
302	1	2018-01-28	Vladivostok	Flag	flag of Russia	Russia			Russia	https://www.vedomosti.ru/politics/articles/2018/01/28/749182-zabastovka#%2Fgalleries%2F140737493734267%2Ffullscreen%2F6
307	1	2018-01-28	Chelyabinsk	Flag	flag of Russia	Russia			Russia	https://www.vedomosti.ru/politics/articles/2018/01/28/749182-zabastovka#%2Fgalleries%2F140737493734267%2Ffullscreen%2F6
317	1	2017-03-26	Izhevsk	Flag	flag of Russia	Russia			Russia	https://www.vedomosti.ru/politics/galleries/2017/03/26/682733-protiv-v-sankt-peterburge#/galleries/140737493196005/fullscreen/1
318	1	2017-06-12	Saratov	Flag	flag of Russia	Russia			Russia	https://www.kommersant.ru/doc/3324044?from=doc_vrez	https://twitter.com/sar_life/status/874224977284878339
320	1	2017-10-07	Arkhangelsk	Flag	flag of Russia	Russia			Russia	https://meduza.io/live/2017/10/07/kak-prohodyat-aktsii-v-podderzhku-navalnogo-po-vsey-rossii-onlayn	https://twitter.com/akozenko/status/916647223210868738
8	5	2017-03-26	Ufa	Flag	flag of Bashkortostan	Bashkortostan			Bashkortostan	https://www.vedomosti.ru/opinion/articles/2017/03/28/682965-kto-molodezh
19	14	2017-03-26	Saint Petersburg	Flag	flag of Saint-Petersburg	Saint-Petersburg			Saint-Petersburg	https://www.vedomosti.ru/politics/galleries/2017/03/26/682733-protiv-v-sankt-peterburge#/galleries/140737493196005/fullscreen/7
294	14	2018-01-28	Saint Petersburg	Flag	flag of Saint-Petersburg	Saint-Petersburg			Saint-Petersburg	https://meduza.io/news/2018/01/28/na-protestnyh-aktsiyah-v-rossii-zaderzhany-180-chelovek
28	19	2017-03-26	Kazan	Balloon	yellow balloon					https://www.rbc.ru/photoreport/26/03/2017/58d7ab1c9a7947392f2a664a	https://twitter.com/El_Dmi/status/845955082143387648. https://meduza.io/live/2017/03/26/aktsii-protiv-korruptsii-po-vsey-rossii-hronika
59	28	2017-03-26	Saint Petersburg	Ribbon	Green	Navalny			Navalny	http://www.fontanka.ru/2017/03/26/060/report.2.html#/?1	http://novayagazeta.spb.ru/reports/289/
60	29	2017-03-26	Saint Petersburg	Balloon	Green	Navalny				http://novayagazeta.spb.ru/reports/289/
107	46	2017-04-29	Barnaul	Flag	Open Russia logo	Open Russia			Open Russia	https://www.kommersant.ru/photo/photo/904055
124	46	2017-06-12	Novosibirsk	Flag	Open Russia logo	Open Russia			Open Russia	https://www.kommersant.ru/photo/photo/923958
119	52	2017-06-12	Saint Petersburg	Flag	LGBT flag	LGBT			LGBT	https://www.kommersant.ru/photo/photo/944506
128	56	2017-06-12	Novosibirsk	Balloon	duck	corruption; Medvedev			corruption; Medvedev	https://www.kommersant.ru/photo/photo/923958
145	56	2017-06-12	Perm	Balloon	duck	corruption; Medvedev			corruption; Medvedev	https://www.kommersant.ru/photo/photo/923376
148	71	2017-06-12	Saint Petersburg	Balloon	turquoise balloon	Navalny; elections		Navalny; elections	Navalny; elections	https://www.kommersant.ru/photo/photo/923535
149	72	2017-06-12	Kazan	Balloon	white, blue, red balloons	Russia			Russia	https://www.kommersant.ru/photo/photo/923223
214	90	2017-10-07	Perm	Balloon	birthday cake	birthday; Putin			birthday; Putin	https://www.kommersant.ru/photo/photo/957051
230	95	2017-10-07	Saint Petersburg	Flag	Artpodgotovka logo	Artpodgotovka			Artpodgotovka	https://www.vedomosti.ru/politics/galleries/2017/10/07/736964-zaderzhaniya-navalnogo-peterburge#/galleries/140737493585506/fullscreen/23
231	95	2017-03-26	Tomsk	Flag	Artpodgotovka logo	Artpodgotovka			Artpodgotovka	https://www.kommersant.ru/photo/category_in/78277?id2=34
232	95	2017-06-12	Novosibirsk	Flag	Artpodgotovka logo	Artpodgotovka			Artpodgotovka	https://www.kommersant.ru/photo/photo/923958
295	114	2018-01-28	Saint Petersburg	Flag	Libertarian party logo	Libertarian Party			Libertarian Party	https://meduza.io/news/2018/01/28/na-protestnyh-aktsiyah-v-rossii-zaderzhany-180-chelovek
319	116	2017-06-12	Saratov	Flag	red flag	socialism			socialism	https://www.kommersant.ru/doc/3324044?from=doc_vrez	https://twitter.com/sar_life/status/874224977284878339
