# Supplementary material for: Against Putin and Corruption, for Navalny and the “Revolution”?
Source: Oxford University Press journal article supplement (doi:10.1525/j.postcomstud.2022.55.1.99), 2022-03-01
Supplement: cpcs-55-01-05-fomin-and-nadskakula-kaczmarczyk-supplement-3.xlsx [file cpcs-55-01-05-fomin-and-nadskakula-kaczmarczyk-supplement-3.xlsx]

## Sheet: description
SUPPLEMENT 3. Database of protests turnout.
Obtaining information about the number of participants in protests in Russia is in general quite problematic due to the fact that neither the data provided the Ministry of Internal Affairs nor the figures declared by the organizers can be fully trusted, as the former tend to underreport and the latter to overreport the turnout of protesters. For this database, the information on the number of par…

## Sheet: data
cityRU	city	2017-03-26	2017-04-29	2017-06-12	2017-10-07	2017-11-05	2018-01-28
Москва	Moscow	7000–25000	1500–3000	5000–45000	700–3000		3000
Санкт-Петербург	St. Petersburg	3000–10000		3500–12000	1000–10000		5000–7000
Новосибирск	Novosibirsk	1500–4000		2500–5000	200	> 0
Екатеринбург	Yekaterinburg	1000–3000		2000–5000	500	> 0
Нижний Новгород	Nizhny Novgorod	400–3000		800–4300	150
Самара	Samara	600–2000		2000	500
Омск	Omsk	450–2000		1500–5000	400
Казань	Kazan	700–1500		500–600	400	> 0
Челябинск	Chelyabinsk	850–2000		2500–4000	200		2000–3000
Ростов-на-Дону	Rostov-on-Don	300–1500		700–1000	200	> 0
Уфа	Ufa	1500–2500		600–2000	200
Волгоград	Volgograd			500–1000	250	> 0
Пермь	Perm	1000–3000	50–60	3000–3500	200	> 0	1300–1500
Красноярск	Krasnoyarsk	450–1500		450–1500	100	> 0
Воронеж	Voronezh	300–1000		500–1500	100
Саратов	Saratov	400–3000		1000–5000	150–500	> 0
Краснодар	Krasnodar	300–1000		300–1000	200–250	> 0	700–750
Тольятти	Tolyatti	500–1000		750–800	30
Ижевск	Izhevsk	500–1200		400–2000	200–500
Ульяновск	Ulyanovsk	300		350–600	10
Барнаул	Barnaul	150–500		> 0	110
Владивосток	Vladivostok	180–1500		200–1500	150
Ярославль	Yaroslavl	200–300		500	400
Иркутск	Irkutsk	300–1131		400–2000	100–150
Тюмень	Tyumen	120–870		300–1500	?
Хабаровск	Khabarovsk	100–500		900–2500	50
Махачкала	Makhachkala	100–150		150–200
Оренбург	Orenburg	400		400–900	100
Новокузнецк	Novokuznetsk	100–200		700	32
Кемерово	Kemerovo	150–250		250–400	?
Рязань	Ryazan	300–400		500–600	150
Томск	Tomsk	400–1131	500	300–1000	20
Астрахань	Astrakhan	300		250–500	50
Пенза	Penza	300–400		700–1000	200
Набережные Челны	Naberezhnye Chelny	200		300–400
Липецк	Lipetsk	300		300	50
Тула	Tula	180–500		50	?
Киров	Kirov	100–400		1030–1530
Чебоксары	Cheboksary	500		150–500	200
Калининград	Kaliningrad	200–500	70	400–700	150–500		250–300
Севастополь	Sevastopol	1
Брянск	Bryansk	300		200	50
Курск	Kursk	100–150		30–200	50
Иваново	Ivanovo	200–850		1000–2000	200
Магнитогорск	Magnitogorsk	500		150–528	130
Улан-Удэ	Ulan-Ude			150	50
Тверь	Tver	150–400		250–350	70
Ставрополь	Stavropol	100–200		200–600	20
Нижний Тагил	Nizhny Tagil	200–300		100–200	20
Белгород	Belgorod	300		95–300	30
Архангельск	Arkhangelsk	350–400		150–800	10
Владимир	Vladimir	200–500		500	50		250
Сочи	Sochi	200–300		100	10
Курган	Kurgan	300		100	40
Симферополь	Simferopol	12		0
Смоленск	Smolensk	1000		200–450	150
Калуга	Kaluga	300		140–300	30
Чита	Chita	100–150		60–80	20
Орёл	Oryol	100–300		250–300	20
Волжский	Volzhsky	200–300		80–200
Череповец	Cherepovets	500		400–600	120		200
Мурманск	Murmansk			100	30
Сургут	Surgut			150–200
Вологда	Vologda	500		400–500	150
Саранск	Saransk	50–70		250–300	50
Тамбов	Tambov	150–200		150	10
Стерлитамак	Sterlitamak			200
Якутск	Yakutsk	60		300–400	50
Кострома	Kostroma	200		200	70
Комсомольска-на-Амуре	Komsomolsk-on-Amur	300–500		200–400	30
Петрозаводск	Petrozavodsk	300–400		250–300	100
Таганрог	Taganrog			250–400
Нижневартовск	Nizhnevartovsk	150		190
Йошкар-Ола	Yoshkar-Ola	70		250	20
Братск	Bratsk			130–170	30
Нальчик	Nalchik			20
Орск	Orsk	25		100	20
Сыктывкар	Syktyvkar	300		300–500	30
Старый Оскол	Stary Oskol	35–40		120	10
Великий Новгород	Velikiy Novgorod	50		300	100
Балашиха	Balashikha	100–150
Благовещенск	Blagoveshchensk	50		250–600
Бийск	Biysk	100–150		300	50
Псков	Pskov	90–100		150–350	20–100		200–250
Рыбинский	Rybinsk			150–200	20
Северодвинск	Severodvinsk			30–50	3
Армавир	Armavir	50		20
Подольск	Podolsk			30–50
Южно-Сахалинск	Yuzhno-Sakhalinsk	150–200		150	15
Петропавловск-Камчатский	Petropavlovsk-Kamchatsky			40
Норильск	Norilsk			50
Мытищи	Mytishchi			40–56
Волгодонск	Volgodonsk			100
Абакан	Abakan			100
Березники	Berezniki			250	12
Салават	Salavat			50
Миасс	Miass			60–200
Рубцовск	Rubtsovsk			40–60
Альметьевск	Almetyevsk	150–200		30–40
Ковров	Kovrov			25
Майкоп	Maykop			40–100
Нефтекамск	Neftekamsk	30		35–60
Сергиев Посад	Sergiev Posad	100		70–200
Кызыл	Kyzyl			30–50
Октябрьский	Oktyabrskiy			30
Ачинск	Achinsk			30
Обнинск	Obninsk	50–70		80–200	18
Сарапул	Sarapul	50		18354
Ессентуки	Essentuki			100
Ухта	Ukhta	70–200		100–150
Воткинск	Votkinsk			35
Соликамск	Solikamsk			40–100
Бердск	Berdsk	40		30–100
Раменское	Ramenskoye			50
Магадан	Magadan			60–80	30
Глазов	Glazov			30
Гатчина	Gatchina	20		15
Саров	Sarov			10–15
Ейск	Yeisk			8
Чайковский	Chaikovsky			70–100
Белово	Belovo			42
Минеральные Воды	Mineralnye Vody			120
Минусинск	Minusinsk	45
Дубна	Dubna			100
Воркута	Vorkuta			70–114
Ступино	Stupino			25–50
Кунгур	Kungur			5–7
Лысьва	Lysva	27		50
Котлас	Kotlas			7
Белебей	Belebey			20
Искитим	Iskitim	40		15
Апатиты	Apatity			30–200
Анапа	Anapa			20
Горно-Алтайск	Gorno-Altaisk			25–100
Геленджик	Gelendzhik			7–11
Чусовой	Chusovoy			43
Печора	Pechora			70–150
Качканар	Kachkanar			60
Коряжма	Koryazhma			20
Алапаевск	Alapaevsk			50
Тосно	Tosno			12
Вятские Поляны	Vyatskiye Polyany			30
Красноармейск	Krasnoarmeysk			15
Кувандык	Kuvandyk			35–50	1
Зея	Zeya			?
Вельск	Velsk			35–100
Оленегорск	Olenegorsk			15–17
Черноголовка	Blackhead			18
Галич	Galich			2
Валдай	Valdai			2
Полярные Зори	Polyarnye Zori			40–100
Орехово-Зуево	Orekhovo-Zuyevo			100
Юргамыш	Yurgamysh			10–20
Солигалич	Soligalich			4
Выкса	Vyksa				3
TOTAL	TOTAL	32359–92861	1700	49661–98720	2560–21520	>0	15000
